# Supplementary material for: Middle to late Holocene plant cover variation in relation to climate, fire, and human activity in the Songnen grasslands of northeastern China
Source: Front Plant Sci. 2023 Jan 9;13:1071273. doi: 10.3389/fpls.2022.1071273 (PMC9868567; doi:10.3389/fpls.2022.1071273)
Supplement: Supplementary file 2 [file Table_1.xlsx]

## Sheet: DBSP
Cal yr BP	Artemisia	Compositae	Chenopodiaceae	Poaceae	Cyperaceae	Sanguisorba	Ephedra	Ranunculaceae	Rosaceae	Pinus	Abies	Piceae	Betula	Carpinus	Alnus	Quercus	Salix	Tilia	Ulmus	Juglans
-39.6	41	3	66	12	87	0	2	0	0	27	0	0	2	1	0	4	0	0	1	0
-23.2	19	1	38	7	94	0	0	1	0	6	0	0	4	2	3	6	0	0	0	0
-5.8	28	3	37	24	76	0	2	1	0	17	0	0	4	0	0	13	0	0	0	0
18.9	41	2	43	20	69	0	2	0	0	12	0	0	1	0	0	5	1	0	0	0
43.1	49	5	29	12	45	0	0	0	0	15	0	0	3	0	1	5	0	0	3	0
52	34	2	19	16	83	0	0	0	0	5	0	0	4	0	0	6	0	0	0	0
60	35	15	66	12	143	0	0	1	1	8	0	0	7	0	1	4	0	0	5	0
68.6	29	0	37	5	28	0	0	0	0	8	0	0	3	0	1	4	0	0	0	0
77.8	19	1	18	9	21	0	0	0	0	10	0	0	1	0	0	4	0	0	3	0
86.9	31	1	30	20	67	0	0	0	0	13	0	0	0	0	0	3	0	0	0	0
98.7	20	1	7	6	23	0	1	0	0	6	0	0	0	0	0	2	0	0	1	0
110.1	5	0	6	4	5	0	0	0	0	4	0	0	1	0	0	1	0	0	3	0
121.4	42	1	67	15	51	0	1	0	0	5	0	0	0	1	0	10	0	0	1	0
132.1	23	0	6	2	4	0	0	0	0	38	0	0	0	0	0	0	0	0	0	0
142.2	25	0	26	4	37	0	3	0	0	13	0	0	0	0	0	5	0	0	0	0
153.2	22	1	33	22	32	0	0	0	0	16	0	0	0	0	0	4	0	0	1	0
164.5	15	5	15	10	41	0	7	0	0	12	0	0	0	0	0	2	0	0	1	0
176.3	23	2	30	8	38	0	5	0	0	17	0	0	0	0	0	2	0	0	0	0
187.9	24	1	26	35	26	0	0	0	0	12	1	0	1	0	0	0	0	0	0	0
198.5	23	0	25	12	108	0	0	0	0	5	0	0	1	1	0	15	1	0	0	1
209.1	43	0	26	15	26	0	3	0	0	9	0	0	0	0	0	4	0	0	0	0
220.5	31	0	27	4	197	0	0	1	0	6	0	0	3	0	1	2	0	0	2	0
231.1	43	15	41	5	13	0	2	0	0	21	0	0	1	0	0	3	0	0	0	0
240.9	30	20	80	20	130	0	0	0	0	40	0	0	0	0	0	10	0	0	0	0
250.7	68	3	63	11	57	0	3	0	0	35	0	0	0	1	0	6	0	0	0	0
262.6	49	2	19	4	19	0	1	0	0	38	0	0	0	0	0	2	0	0	0	0
274.4	102	0	53	18	30	0	5	0	0	34	0	0	2	1	1	5	0	0	0	0
286.2	46	1	33	45	76	0	2	0	0	10	0	0	2	1	0	1	0	0	1	0
298.2	55	0	13	6	17	0	0	1	0	8	0	0	1	0	0	5	0	0	0	0
309.3	30	0	30	60	105	0	10	0	0	30	0	0	0	0	0	10	0	0	5	0
323.9	37	1	34	17	53	0	3	0	0	47	0	0	1	0	0	2	0	0	0	0
339.6	17	2	6	8	11	0	1	0	0	11	0	0	2	0	0	1	0	0	1	0
354.9	54	6	78	42	72	0	0	0	0	48	0	0	0	0	0	6	0	0	0	0
369.8	36	4	38	11	70	0	0	0	0	26	0	0	1	0	0	9	0	1	0	0
382.4	32	2	27	0	13	0	1	1	0	43	0	0	0	0	0	6	0	0	0	0
403.2	114	6	78	28	61	0	0	0	0	30	0	0	6	0	0	0	0	0	0	0
418.7	33	2	41	26	40	0	3	1	0	27	0	0	0	1	0	7	0	0	1	0
432.3	11	3	20	15	25	0	1	0	0	17	0	4	0	0	0	1	0	0	0	0
445.7	42	57	36	27	63	0	0	0	0	0	0	0	3	0	0	3	0	0	0	0
459.9	47	3	45	13	109	0	0	0	0	13	0	0	0	0	0	4	0	0	0	0
481.3	16	2	35	11	54	0	1	1	0	13	0	0	0	0	0	2	0	0	1	0
502.4	46	2	48	8	186	0	2	0	0	14	0	0	0	0	0	2	0	0	2	0
523.7	24	4	44	18	174	0	0	3	0	6	0	0	1	1	1	2	0	0	0	2
545	11	3	22	5	181	0	0	0	0	20	0	0	0	0	0	3	0	0	0	0
564.9	22	3	40	7	126	0	0	0	0	4	0	0	0	1	0	2	0	0	0	0
588.5	37	4	35	7	131	0	2	0	0	19	0	0	0	0	0	1	0	0	1	0
612.6	40	6	46	6	172	0	2	2	0	38	0	0	0	2	0	2	0	0	0	0
636.4	48	2	66	22	152	0	2	0	0	44	0	0	2	0	0	2	0	0	0	0
660.1	59	3	40	16	61	0	3	0	0	11	0	0	4	0	0	3	0	0	0	0
681.2	33	1	41	13	104	0	0	0	0	22	0	0	2	0	0	8	0	0	0	0
704.3	56	4	54	10	168	0	0	0	0	22	0	0	2	0	0	8	0	0	0	0
728.7	37	2	33	17	81	0	0	0	0	12	0	0	0	0	1	7	0	0	1	0
753.7	76	0	80	16	128	0	0	0	0	16	0	0	2	0	0	3	0	0	0	0
777.3	66	10	64	12	182	0	4	0	0	46	0	0	0	2	0	6	0	0	2	0
800	20	6	55	8	83	0	0	1	0	23	0	0	2	0	0	6	0	0	0	0
823.4	78	12	57	15	135	0	3	3	0	51	0	0	0	0	0	9	0	0	0	0
847.3	37	5	46	53	59	0	1	0	0	13	0	0	4	0	0	8	0	0	0	0
870.8	37	1	37	16	81	0	0	0	0	16	0	0	0	2	0	3	0	1	1	1
895.3	78	9	22	20	90	0	0	0	0	47	0	0	0	0	0	0	0	0	10	0
917.6	60	0	66	6	54	0	6	0	0	54	0	0	0	0	0	0	0	0	6	0
941.6	45	4	23	0	36	0	2	0	0	34	1	0	0	0	0	20	0	0	2	0
966.5	31	4	21	49	58	0	0	0	0	31	1	0	0	0	0	3	0	0	0	0
990.8	32	0	48	40	84	0	4	0	0	84	0	0	8	0	0	12	0	0	0	0
1016.7	53	5	55	18	134	0	0	0	0	42	1	0	1	1	0	4	0	0	5	1
1040.3	84	12	44	32	68	0	4	4	0	44	0	0	0	0	0	4	0	0	0	0
1062.8	111	6	36	45	81	0	0	3	0	33	0	0	0	3	0	6	0	0	0	0
1086.6	63	9	46	23	32	0	0	0	0	21	0	0	0	0	0	13	0	0	1	0
1111.7	16	0	54	24	124	0	0	0	0	68	0	0	0	4	0	0	0	0	0	0
1137.8	36	6	58	26	88	0	6	0	0	51	0	0	0	0	0	5	0	0	0	0
1162.8	47	2	44	13	50	0	2	0	0	34	0	0	1	0	0	3	0	0	1	0
1182.2	57	3	96	21	132	0	0	0	0	36	0	0	3	0	0	6	3	0	0	0
1203	63	9	33	27	81	0	0	0	0	61	0	0	3	3	0	12	0	0	0	0
1225.9	32	1	38	11	45	0	1	0	0	58	0	0	0	0	0	4	0	0	1	0
1252.1	27	3	30	13	63	0	1	0	2	49	0	0	2	0	0	5	0	0	2	0
1275.1	63	9	33	27	81	0	0	0	0	36	0	0	12	3	0	12	0	0	0	0
1300.5	35	6	26	18	63	0	0	1	0	37	0	0	0	1	0	8	0	0	0	0
1322.3	48	0	54	18	84	0	0	0	0	48	0	0	0	0	0	24	0	0	0	0
1342.9	42	5	25	12	37	0	3	0	0	39	0	0	2	0	0	3	1	0	0	0
1364.2	41	2	25	26	59	0	2	0	0	29	0	0	0	0	0	11	0	0	1	0
1385	32	16	56	8	96	0	0	8	0	40	0	0	8	0	0	32	0	0	0	0
1411.7	36	12	54	15	58	0	3	0	0	93	0	0	9	0	0	0	0	0	0	0
1437.7	45	21	44	22	95	0	0	2	0	36	0	0	2	1	0	9	0	0	3	1
1463.2	57	7	34	18	36	0	1	1	0	15	0	1	1	0	0	5	0	0	1	0
1487.6	41	4	41	19	56	0	1	0	0	30	0	0	2	2	0	1	0	0	1	0
1510.4	25	14	35	22	50	0	1	0	0	28	0	0	0	0	0	13	0	0	0	0
1537.6	36	3	17	12	12	0	0	0	0	26	0	0	1	0	0	3	0	0	1	0
1564.9	21	11	16	11	14	0	0	1	0	23	0	0	2	0	0	2	0	0	1	0
1591.2	26	46	26	25	57	0	2	0	0	21	1	0	1	0	0	17	0	0	0	0
1617.5	30	21	18	7	10	0	1	1	0	17	0	0	0	0	0	1	0	0	2	0
1643.3	126	3	18	84	18	0	0	0	0	30	0	0	0	0	0	3	0	0	6	0
1670.3	42	23	24	11	45	0	1	1	0	47	0	0	0	1	0	6	0	0	1	0
1697.9	45	12	19	9	28	0	2	1	0	24	0	0	0	0	0	4	0	0	2	0
1725.2	49	6	16	6	19	0	0	0	0	11	0	0	0	0	0	1	0	0	1	0
1751.6	62	3	41	22	35	0	1	0	0	36	0	0	0	1	0	7	0	0	0	0
1776.6	39	5	20	13	14	0	1	1	0	26	0	0	0	0	0	3	0	0	1	0
1802.5	32	2	37	31	57	0	0	0	0	27	0	0	1	1	0	11	0	0	1	0
1831.2	66	0	50	32	37	0	0	0	1	25	1	0	1	0	0	11	0	0	0	0
1857	17	2	21	6	10	0	0	0	0	40	0	0	0	0	0	7	0	0	4	0
1882.6	27	0	19	10	16	0	1	1	0	30	0	0	0	0	0	3	0	0	0	0
1907.2	40	3	31	11	46	0	0	0	0	54	0	0	1	0	0	5	0	0	1	0
1933.1	57	2	25	18	21	0	1	1	0	12	0	0	3	0	0	3	0	0	1	0
1957.9	15	2	14	16	29	0	0	2	0	19	0	0	0	0	0	6	0	0	4	0
1983.8	60	19	52	19	107	0	0	4	0	23	0	0	0	1	0	6	0	0	5	0
2008.4	27	2	15	12	15	0	0	0	0	21	0	0	1	0	0	3	0	0	4	0
2032.2	28	4	6	7	23	0	0	0	0	23	0	0	1	2	0	7	0	0	1	0
2059	40	3	30	37	42	0	3	0	0	24	0	0	1	0	0	7	0	0	0	0
2088	76	2	48	20	74	0	6	0	0	86	0	0	2	0	0	14	6	0	0	0
2115.5	27	0	12	10	18	0	0	0	0	26	0	0	1	0	0	3	0	0	1	0
2143.7	31	1	22	34	39	0	3	0	0	44	0	0	0	0	0	7	0	0	1	0
2169.5	20	0	35	25	121	0	0	0	0	40	0	0	0	0	0	5	0	0	0	0
2196.4	8	3	15	7	14	0	1	0	0	27	1	0	1	0	0	4	0	0	6	0
2224.9	0	1	13	32	60	0	5	1	0	32	0	0	1	0	0	2	0	0	0	0
2253.4	46	0	34	22	136	0	7	0	0	45	0	0	3	0	0	3	0	0	3	0
2281.6	11	0	3	5	5	0	0	1	0	9	0	0	0	0	0	2	0	0	1	0
2310.5	39	1	17	30	47	0	2	0	0	43	2	0	0	0	0	3	0	0	0	0
2337.9	40	0	35	35	150	0	5	0	0	55	0	0	0	0	0	5	0	0	5	0
2365.9	96	0	60	24	48	0	0	0	0	30	0	0	0	0	0	18	0	0	6	0
2394	34	4	16	47	38	0	4	0	0	32	0	0	0	2	0	3	1	0	1	0
2424.7	15	0	42	33	92	0	4	1	0	78	0	0	0	0	0	12	0	0	0	0
2452.8	48	0	24	42	24	0	0	0	0	168	0	0	6	0	0	0	0	0	6	0
2478.4	24	9	32	19	95	0	4	0	0	30	0	0	0	1	2	0	0	0	45	1
2505.6	10	0	42	33	191	0	0	0	0	23	0	0	0	0	0	0	0	0	0	0
2533.3	18	2	14	16	25	0	1	0	0	23	0	0	0	0	0	1	0	0	2	0
2561	66	14	41	28	43	0	3	1	0	27	0	0	0	1	0	0	1	0	1	0
2586.8	6	0	4	3	22	0	1	0	0	31	0	0	0	0	0	2	0	0	0	0
2612.6	23	1	16	5	38	0	0	0	0	38	0	0	1	0	0	7	0	0	2	0
2638.4	53	5	18	17	90	0	0	0	0	36	0	0	1	0	0	7	0	0	0	0
2665.9	33	0	36	18	168	0	6	0	0	69	0	0	0	0	0	9	0	0	0	0
2694.1	32	1	23	20	56	0	0	0	0	60	0	0	0	1	0	7	0	0	0	0
2721	17	6	18	10	102	0	1	0	0	39	0	0	1	0	0	3	0	0	1	0
2746	54	10	63	16	97	0	4	0	0	34	0	0	0	2	0	8	0	0	0	0
2770.6	41	3	23	13	52	0	0	0	0	32	0	0	4	0	0	3	0	0	0	0
2797	46	6	22	34	71	0	3	0	0	24	0	0	1	2	0	2	0	0	3	0
2823.6	20	2	28	28	96	0	0	0	0	80	0	0	4	0	0	6	0	0	0	0
2847.8	47	0	31	17	80	0	5	1	0	53	0	0	3	0	0	9	0	0	1	0
2876.9	25	0	14	24	71	0	3	0	1	42	0	0	1	0	1	5	2	0	2	0
2903.2	18	0	13	13	16	0	0	0	0	17	0	0	0	0	0	2	0	0	0	0
2925.1	14	1	14	7	21	0	1	0	0	24	0	0	0	0	0	5	0	0	2	0
2947	44	7	33	20	28	0	4	0	0	48	0	0	1	0	0	3	1	1	0	0
2967.3	51	9	54	21	57	0	0	0	0	111	0	0	3	0	0	18	0	0	6	0
2995.1	50	2	19	14	36	0	0	0	0	67	0	0	0	0	0	2	0	0	1	0
3023	53	3	24	7	46	0	0	1	0	58	0	0	0	0	0	8	0	0	3	1
3050.6	54	13	45	39	87	0	0	4	0	61	0	0	0	0	0	10	0	0	0	0
3077.6	55	5	36	45	103	0	0	0	0	89	0	0	0	0	0	10	0	0	0	0
3103.9	71	6	32	6	32	0	1	0	0	69	0	0	1	0	0	5	0	0	2	0
3130.9	39	5	21	29	127	0	0	5	0	9	0	0	6	0	0	13	0	0	0	0
3158.1	41	5	47	25	83	0	2	2	0	74	0	0	0	0	0	22	0	0	3	0
3184.7	17	4	19	21	126	0	0	0	0	72	0	2	0	0	3	5	0	0	2	4
3211.2	26	34	21	9	22	0	0	0	0	19	0	0	1	0	0	3	0	0	2	0
3237.4	69	9	27	15	42	0	6	3	0	101	0	0	0	0	0	9	0	0	9	0
3266.4	81	6	30	9	47	0	2	0	0	27	0	0	0	0	0	0	0	0	0	0
3296.6	9	8	6	7	17	0	0	0	0	44	0	0	0	1	0	4	0	0	2	0
3325.3	20	3	9	2	7	0	3	0	0	53	0	0	0	0	0	3	0	0	0	0
3353.4	108	18	30	14	15	0	0	0	0	30	0	1	3	0	0	2	0	0	0	0
3380.4	22	10	13	6	15	0	0	1	0	33	0	0	1	0	0	0	0	0	1	0
3409.9	20	3	13	4	22	0	1	0	0	35	0	0	1	0	0	10	0	0	3	0
3438.3	64	18	18	13	50	0	2	0	0	30	0	0	1	0	0	1	0	0	0	0
3468.9	25	4	28	23	26	0	1	3	0	41	0	0	0	0	0	6	0	0	3	0
3498.3	30	14	9	2	7	0	2	0	0	39	0	0	0	0	0	3	0	0	1	0
3525.1	48	22	21	7	57	0	2	0	0	43	0	0	0	1	0	5	0	0	0	0
3552.5	21	1	11	4	25	0	0	0	0	5	0	0	1	0	0	8	0	1	1	0
3581.2	93	3	48	24	36	0	6	3	0	96	0	0	0	0	0	12	0	0	18	0
3610.6	46	7	39	9	68	0	3	2	0	76	1	0	2	2	0	8	2	0	0	0
3640.7	39	2	27	12	19	0	2	0	0	43	0	0	1	0	1	7	0	0	3	0
3668.3	74	7	37	3	32	0	1	0	0	40	0	2	1	0	0	9	0	0	1	0
3696	43	1	28	25	129	0	1	0	0	47	0	0	1	1	0	8	0	0	1	0
3726.6	67	9	26	4	45	0	0	0	0	45	0	1	0	2	1	11	0	1	0	0
3755.5	25	2	10	3	34	0	0	2	0	31	0	0	0	0	0	1	0	0	1	0
3784.1	13	35	14	5	16	0	0	1	0	15	0	0	0	0	0	3	0	0	1	0
3810.5	42	51	14	11	63	0	0	0	0	44	0	0	0	0	0	11	0	0	9	0
3838.4	16	111	15	4	26	0	1	0	0	16	0	0	0	0	0	6	0	0	6	0
3866.5	5	38	2	5	18	0	1	1	0	12	1	0	0	1	0	2	0	0	4	0
3895.2	24	36	31	34	90	0	0	0	0	32	0	0	0	0	0	0	0	0	0	0
3923.1	30	10	30	35	60	0	0	0	0	70	0	0	0	0	0	10	0	0	5	0
3950.3	25	16	24	10	51	0	6	1	0	50	0	0	0	0	0	3	0	0	1	0
3979.1	23	85	7	35	40	0	6	5	0	32	0	0	11	0	0	10	0	0	0	0
4008.8	31	53	35	16	54	0	4	0	0	31	0	0	1	2	0	16	0	0	7	0
4038.5	16	62	22	11	54	0	1	1	0	21	0	1	0	0	0	3	0	0	4	0
4066.7	63	3	57	42	54	0	0	6	0	42	0	0	0	0	0	6	0	0	3	0
4094.8	28	0	14	5	48	0	2	1	0	20	0	0	0	1	0	6	0	0	2	0
4122.7	32	15	41	18	49	0	2	0	0	30	0	1	1	1	1	6	0	0	5	0
4150.8	31	7	13	16	31	0	1	1	0	21	0	0	7	0	0	6	0	0	0	0
4179	37	8	36	9	53	0	2	0	0	34	0	1	3	0	0	15	0	0	2	0
4208.7	33	9	28	12	69	0	1	1	0	41	2	0	0	0	0	6	0	0	3	0
4236.5	48	19	40	36	88	0	4	4	0	60	0	0	8	0	0	4	0	0	0	0
4267.6	10	3	12	5	29	0	1	0	0	30	0	0	1	0	0	4	0	0	1	0
4297.7	40	19	64	13	74	0	3	5	1	37	2	2	1	1	4	4	1	0	2	2
4327.9	13	4	14	6	34	0	1	0	0	13	0	0	2	0	0	1	0	0	0	0
4357.8	58	8	52	3	46	0	2	1	0	24	0	1	2	2	0	5	0	0	0	0
4387.8	38	19	20	21	64	0	0	2	0	55	0	0	2	1	0	7	0	0	3	0
4414	45	18	51	30	87	0	3	0	0	78	0	0	0	0	3	18	0	0	0	0
4441.7	11	6	8	3	25	0	0	0	0	9	0	0	0	0	0	6	0	0	0	0
4470	35	41	41	9	47	0	2	0	0	14	0	0	1	0	0	5	0	0	1	0
4499.2	24	34	32	8	55	0	1	0	0	28	1	2	1	1	0	6	3	0	2	0
4526.8	16	19	16	18	36	0	1	0	0	21	0	0	4	0	0	4	1	0	0	0
4556.1	42	20	22	19	59	0	2	1	0	26	2	2	3	0	0	4	0	0	2	0
4586.8	41	5	34	32	144	0	0	0	0	85	0	0	11	0	0	0	0	0	5	5
4614.5	54	24	72	24	66	0	0	0	0	42	0	0	6	0	6	0	0	0	0	0
4644	13	100	9	6	42	0	1	0	0	17	0	3	1	0	1	2	0	0	0	0
4672.4	8	5	6	8	30	0	1	0	0	8	0	0	0	0	0	4	0	0	1	0
4700.5	45	12	24	24	99	0	6	9	0	57	0	0	6	0	3	12	0	0	0	0
4732.4	28	17	27	11	79	0	1	0	0	20	0	0	6	0	0	3	0	1	1	0
4763.9	41	46	32	10	85	0	1	0	0	11	2	5	1	0	0	5	0	0	2	0
4793.7	30	21	47	60	84	0	6	6	0	48	0	0	0	0	0	6	0	0	0	0
4822.6	30	16	19	10	98	0	0	1	0	23	4	5	0	0	0	7	0	0	5	0
4850.2	47	64	12	18	126	0	0	0	0	48	0	0	0	6	0	0	0	0	0	0
4881.2	72	15	45	6	99	0	0	0	0	92	0	0	16	0	0	0	0	0	6	0
4912.3	58	23	34	12	79	0	0	1	0	38	2	0	4	1	1	4	0	0	1	0
4943.8	19	2	27	8	69	0	3	0	0	45	0	0	0	0	0	9	0	0	3	0
4974.6	80	5	35	37	70	0	0	0	0	45	0	0	0	0	0	5	0	0	0	0
5002	21	9	26	10	97	0	0	0	0	16	1	20	0	0	0	3	0	0	3	0
5030.7	29	4	26	9	59	0	2	0	0	29	0	1	2	0	1	6	0	0	3	0
5058.6	26	4	30	5	65	0	2	0	0	29	0	2	1	0	0	4	0	0	2	0
5088.8	37	5	37	15	98	0	2	0	0	8	1	20	1	1	0	9	0	0	1	0
5117.1	20	3	24	4	82	0	0	0	0	37	0	0	0	1	0	5	0	0	0	0
5144.9	20	1	13	5	81	0	3	0	0	43	0	2	0	0	0	6	0	0	1	0
5173.1	37	7	19	17	85	0	2	1	0	11	3	9	2	0	0	15	1	0	3	1
5203.8	49	3	28	11	33	0	0	0	0	17	0	1	1	1	0	4	0	0	3	0
5234.2	47	2	32	9	41	0	2	1	0	15	0	2	2	0	0	9	0	0	5	0
5264.8	44	10	36	12	32	0	2	3	0	7	4	13	1	3	0	10	0	0	0	0
5290.2	38	5	18	12	48	0	1	0	1	22	1	0	5	0	1	15	0	0	0	0
5317.1	34	0	19	32	40	0	1	0	0	7	2	1	2	0	0	10	0	0	0	0
5344	45	5	22	11	55	0	1	0	0	5	3	12	1	0	0	8	0	0	2	0
5370.9	48	3	19	8	56	0	0	0	0	12	2	1	4	4	2	13	0	0	3	0
5399	61	4	30	10	28	0	1	0	0	12	0	1	6	1	0	12	0	0	0	0
5422.9	73	1	30	17	40	0	1	1	0	3	0	1	15	2	0	13	0	0	3	5
5447.4	39	3	0	18	57	0	0	0	0	18	1	0	6	3	1	14	0	0	0	0
5472.9	22	2	20	31	36	0	1	0	0	13	0	0	1	1	1	11	0	0	0	0
5500.6	60	6	26	34	55	0	1	0	1	9	1	0	5	2	0	7	0	1	1	1
5528.3	18	0	26	11	64	0	1	0	0	11	1	0	1	0	0	8	0	0	7	0
5554.6	31	2	33	16	46	0	0	0	0	14	0	0	0	0	0	7	0	0	2	0
5580.6	43	2	30	24	89	0	0	1	0	1	0	2	9	1	2	5	0	0	3	0
5604.3	8	2	8	3	26	0	0	0	0	3	0	0	2	0	0	4	0	0	0	0
5626.8	22	1	25	17	64	0	1	0	0	19	0	0	3	0	0	11	0	0	2	0
5648.3	29	6	28	15	24	0	0	0	0	75	3	0	2	1	1	8	0	0	9	1
5674	2	2	4	4	13	0	0	0	0	5	0	0	0	1	0	1	0	0	0	0
5701	64	0	8	20	48	0	0	4	0	8	0	0	4	0	0	20	0	4	4	0
5727.3	31	2	30	17	118	0	1	0	0	15	0	2	3	1	0	12	3	0	13	0
5752.9	5	4	7	6	20	0	0	0	0	4	0	0	2	2	0	2	1	0	0	0
5776.2	20	4	16	20	53	0	1	0	0	25	0	0	1	2	0	12	0	0	0	0
5802.8	41	4	15	31	87	0	1	0	0	7	0	0	0	0	1	2	0	0	3	0
5831	10	0	7	16	15	0	0	0	0	8	0	0	1	0	0	1	0	0	0	0
5859.5	57	3	23	10	28	0	0	0	0	1	0	0	3	0	1	11	0	0	1	0
5886.1	44	0	21	22	38	0	1	0	0	4	0	0	3	1	0	4	0	0	2	0
5911.7	56	1	21	8	10	0	0	0	0	1	0	0	3	1	0	11	0	0	0	0
5938.6	27	0	22	19	17	0	1	0	0	4	0	0	4	2	1	8	0	0	1	1
5965.5	44	0	12	33	75	0	0	2	0	2	0	0	4	0	0	13	1	0	4	1
5992.6	27	3	32	7	53	0	0	1	0	49	0	0	0	1	0	5	0	0	2	0
6018.4	41	3	16	7	45	0	0	0	1	4	0	0	5	0	0	11	0	0	0	0
6044	33	1	14	10	52	0	0	0	0	4	0	1	2	0	0	7	0	1	0	0
6070.8	35	1	22	8	44	0	1	1	0	2	0	0	1	1	0	11	0	0	0	0
6098.2	24	1	18	15	23	0	0	0	1	4	0	0	4	0	0	7	0	0	0	0
6125	34	0	17	18	50	0	1	0	0	4	0	2	3	0	0	7	0	0	1	0
6152.2	50	7	16	23	37	1	1	3	0	5	0	0	15	1	1	7	3	0	4	0
6179.2	33	1	18	17	37	0	0	0	0	5	0	0	3	1	0	3	0	0	3	0
6204.5	29	2	22	12	48	0	2	0	0	6	0	0	8	0	0	4	0	0	1	0
6231.9	40	4	14	6	50	0	0	0	0	12	0	0	2	2	0	6	0	0	0	0
6258.1	32	4	22	20	38	0	0	0	0	2	0	0	10	0	0	12	0	0	0	0
6283.5	48	0	18	15	43	0	2	0	0	1	0	0	0	1	0	13	1	1	2	0
6308.9	29	2	13	7	33	0	0	0	0	1	0	0	4	1	0	7	1	0	0	0
6337.1	35	2	14	6	36	0	0	0	0	6	0	0	2	2	0	7	0	0	1	0
6362.4	41	2	9	22	71	0	1	0	0	2	0	0	4	0	1	14	1	0	5	0
6390.9	42	0	28	12	30	0	0	0	0	2	0	0	4	4	0	22	0	0	0	0
6417.8	77	5	43	26	78	0	1	0	0	4	0	0	7	0	0	31	1	0	0	0
6446.2	41	0	25	25	67	0	0	0	0	2	0	1	0	0	0	10	0	0	1	0
6472.8	63	0	39	21	0	0	3	0	0	12	0	0	8	0	0	8	0	0	3	0
6499.9	54	6	51	22	97	0	0	0	0	5	0	0	2	1	0	14	0	0	0	0
6529.7	43	3	18	13	41	0	1	1	0	2	0	1	1	0	0	13	0	0	0	1
6557.4	52	0	38	16	54	0	0	0	0	10	0	0	0	0	0	22	0	0	0	0
6586.2	48	0	24	4	44	0	0	4	0	16	0	0	4	4	0	0	0	0	0	0
6611.9	55	4	23	22	49	0	0	2	1	3	2	0	3	2	0	17	1	0	4	0
6637.5	20	3	27	12	121	0	1	1	0	33	0	0	0	0	0	4	0	1	2	0
6664.5	84	2	36	46	88	0	0	0	0	2	0	0	8	0	0	16	0	0	4	0
6691.8	72	2	16	10	39	0	0	0	0	1	0	0	5	5	1	14	0	0	3	0
6717.2	49	3	27	9	36	0	1	0	0	3	0	0	8	0	0	4	0	0	0	0
6742	32	1	21	6	32	0	1	0	0	4	0	0	0	1	0	15	0	0	1	0
6769.1	57	1	25	22	53	0	1	0	0	1	0	0	3	0	0	10	2	0	1	0
6796.5	36	6	12	6	42	0	0	0	0	6	0	0	12	6	0	0	0	0	0	0
6825.6	36	3	18	22	67	0	0	0	0	2	0	0	0	0	0	7	0	0	2	0
6852.5	37	0	32	16	52	0	0	0	0	4	0	0	1	1	0	5	0	0	1	0
6879.1	57	0	51	27	51	0	0	0	0	0	0	0	0	0	0	12	0	0	3	0
6905.6	9	4	14	5	20	0	1	0	0	2	0	0	0	1	0	11	0	0	0	0
6932	57	2	18	26	66	0	2	0	0	5	0	0	1	1	1	16	0	0	0	0
6958.1	31	0	48	23	73	0	0	0	0	0	0	0	11	0	0	25	0	0	0	0
6985.2	87	0	48	12	69	0	0	0	0	6	0	0	3	0	0	12	0	0	3	0
7010.1	44	6	24	45	60	0	0	0	0	0	0	0	3	1	0	5	0	0	7	1
7037.2	32	0	11	30	69	0	0	11	0	0	0	0	0	0	0	21	0	0	0	0
7063.4	43	1	13	28	36	0	0	0	0	4	0	0	0	1	0	1	2	0	4	4
7091.8	45	0	26	21	29	0	0	0	0	1	0	0	3	0	0	9	1	0	9	2
7116.6	42	0	14	14	46	0	0	0	0	4	0	0	14	4	0	24	0	0	0	0
7140	76	0	36	10	38	0	0	0	0	12	0	0	14	0	0	12	0	2	2	0
7163.9	49	8	36	26	42	2	1	0	0	8	0	0	3	1	0	16	1	0	9	0
7189	63	5	30	18	43	0	0	2	0	4	0	0	11	3	1	11	1	0	2	0
7214.5	13	3	21	8	38	0	1	0	0	1	0	0	3	3	0	13	0	0	0	0
7239.3	43	2	22	24	41	0	0	0	0	7	0	0	2	0	0	8	0	0	20	3
7261.3	10	2	12	9	22	0	1	0	0	2	0	0	2	0	1	7	0	0	2	0
7285.4	44	0	24	16	11	0	0	1	0	0	0	0	1	0	0	14	0	0	1	0
7306.4	41	6	18	30	79	1	0	0	0	2	1	0	1	3	2	7	1	0	13	4
7324.1	40	10	10	9	66	0	0	0	0	3	1	0	1	0	0	10	2	0	4	1
7340.5	41	2	13	10	17	0	0	0	0	4	0	0	2	1	0	14	1	0	0	0

## Sheet: DBSL
Cal yr BP	Artemisia	Compositae	Chenopodiaceae	Ephedra	Pinus	Betula
456.6	118.216	76.4955	43.3522	1.66714	50.4052	23.7389
541.4	0	146.512	12.3006	3.49948	149.339	3.7193
621.6	190.923	7.35497	3.973	2.4511	100.953	10.5399
714.7	1.36225	125.096	103.435	7.38983	64.7931	12.4867
793.4	90.4883	40.4989	74.5897	5.71034	99.3433	2.8411
876.2	45.4014	100.965	84.4458	8.59085	62.7551	12.3047
989.1	159.454	59.4542	54.7853	17.2741	7.82224	11.4074
1057.5	97.7539	5.63159	185.616	7.90736	15.1512	4.12558
1128	65.8839	192.206	11.5367	1.96674	10.2993	15.4489
1201	142.951	83.4818	4.64061	4.06054	76.6537	4.35058
1251.5	99.3435	192.727	5.92951	2.65718	6.91776	2.43621
1390.7	117.592	95.4533	31.7619	10.8297	58.0048	0.515699
1450.6	184.943	73.9214	33.3743	5.62627	4.76069	3.57012
1571.9	124.461	160.121	9.59459	1.11992	11.1771	5.48262
1683.7	89.2253	69.8119	128.65	2.36853	6.95367	1.6916
1774.2	135.112	0.792888	159.186	0.348871	0.729457	0.380586
1821.4	5.96236	96.2673	140.943	5.31255	52.7979	10.6368
1881.4	45.6488	26.5211	23.9337	26.0898	37.2854	11.4705
1981.5	5.22896	156.189	95.8597	2.76836	46.7556	6.17968
2052.9	63.5646	60.8409	174.913	4.47795	3.69938	3.78904
2141.7	7.60342	159.331	45.2061	5.22735	98.9318	2.35521
2223.4	77.3678	66.7961	77.2282	4.58022	44.4015	4.78644
2307.1	114.606	80.6339	106.742	3.49768	3.47645	3.04926
2371.9	132.03	96.5394	9.49639	4.85901	68.8681	1.69746
2446.4	96.5981	3.47195	118.341	0.796954	61.5754	2.42001
2479.1	12.7674	244.422	15.9337	5.32609	10.3161	13.4824
2511.9	183.497	12.3079	9.46763	11.44	9.70432	9.86211
2560.4	23.5022	26.4664	21.5966	26.2547	141.542	26.043
2639	5.76223	100.379	174.694	4.65588	22.6019	5.67004
2712.5	37.8485	70.8885	66.6964	3.40036	74.5531	2.81981
2781.8	296.696	4.53539	4.57226	1.31641	4.46164	1.96913
2811	5.24446	250.253	30.0386	5.33115	18.4184	4.42095
2916.1	12.2759	232.385	14.0655	13.9821	26.6241	14.3312
3003.5	230.27	4.13565	33.0014	1.32301	14.559	2.51976
3097.6	8.51731	7.42999	134.05	17.4067	119.837	6.10105
3126	315.503	0.743059	0.775366	1.13074	0.743059	0.678445
3200.7	194.315	5.12592	9.43592	2.41445	70.5733	17.0422
3257.5	10.1991	9.38315	152.395	8.56723	94.7784	33.9064
3313.8	216.515	8.87851	32.4359	2.53789	25.0434	10.7064
3371.9	278.698	5.92672	5.19939	4.01771	11.2312	3.23219
3420.8	11.0606	12.6406	252.723	9.07988	12.1469	8.00989
3459.4	209.524	14.0797	11.5817	13.9661	18.8218	18.3944
3516.3	37.7385	7.3457	238.247	4.68079	7.47864	10.0447
3591.9	7.64285	5.62023	222.052	6.71578	51.2148	16.6167
3638.9	55.2337	14.3081	68.3362	17.6816	18.3032	13.2036
3725.9	191.949	9.69841	11.2571	6.38022	21.1287	4.32965
3764.4	5.69864	234.699	24.0399	4.89208	31.2968	10.9357
3854.7	128.434	23.8697	36.4287	8.43365	12.7051	9.43566
3935.8	265.69	11.5955	18.8564	4.66363	6.9825	5.79372
3973.6	24.6585	13.981	200.129	5.8837	11.6294	4.54649
4039	81.7227	24.1884	23.6548	23.4769	21.8762	22.2675
4117.4	7.69626	94.5495	163.564	2.81429	12.354	26.8697
4173.8	54.3268	95.2787	137.092	9.17528	6.62006	6.04631
4278.3	90.7765	111.688	81.0621	6.46052	3.83558	6.59758
4339.3	77.7378	179.248	6.65192	1.58737	10.0476	6.59827
4394.2	220.669	8.26708	9.49134	7.06715	7.40037	7.20036
4435.5	3.90373	209.303	87.4029	4.36093	4.39747	4.32576
4501.1	149.38	149.868	5.12591	4.16064	3.39508	4.09407
4565.7	314.669	0.683611	0.683611	0.813822	2.00442	0.716164
4620.1	9.78837	101.395	87.2079	4.1664	4.75868	61.1815
4705.2	182.537	17.4038	11.7064	4.78605	94.1808	4.03452
4777.6	84.12	57.7494	137.658	1.56163	4.69552	5.15285
4853.8	27.3488	206.218	68.9526	3.95057	4.81109	5.124
4907.8	232.843	12.959	15.373	16.0082	13.4628	10.906
4952	8.48041	29.3874	263.959	2.58359	6.68647	1.39598
5015.7	188.122	22.6581	95.092	3.69741	3.34079	4.09713
5115.2	24.0541	30.432	245.951	5.72585	4.57528	5.06662
5217.5	173.657	19.3292	19.6461	9.05837	30.2106	19.1708
5312.8	102.197	69.9667	108.507	6.64102	3.97912	7.84848
5354.2	8.48686	9.00346	258.835	4.09674	9.60392	9.74144
5395.6	72.4147	93.5014	6.94493	6.66934	5.20043	3.06744
5463.7	42.4272	33.3356	46.5597	43.5292	35.3793	33.8866
5540.8	8.03811	63.2576	210.672	13.2704	3.94213	8.01247
5573.5	115.402	18.3224	23.3194	19.3824	10.2519	18.6253
5628.5	7.20626	66.4302	212.932	10.3107	3.46015	8.47347
5659.6	197.293	17.6825	17.824	17.5411	13.3977	17.3996
5722.8	93.3926	91.1436	113.338	2.52757	2.40822	6.20964
5794.8	60.2669	51.0098	87.2361	6.04364	2.56504	6.73184
5869	7.8355	30.4464	167.649	7.76586	2.10688	4.35306
5910.6	199.944	16.0728	19.6445	15.6901	15.1428	15.3074
5964.9	8.02429	56.4361	226.526	3.93643	3.97979	6.22607
6006.8	166.701	34.4203	5.3642	22.7978	13.5223	35.3143
6041.6	13.5386	129.412	132.192	10.8944	5.34141	13.2213
6071.4	118.663	11.3764	87.5395	11.5242	4.54319	9.16025
6119.4	7.53423	103.833	176.932	9.71656	3.14359	6.49502
6152.1	220.689	13.8025	17.2812	22.2187	12.7908	5.16265
6259.7	84.0549	69.1822	140.817	2.33417	2.72087	4.05754
6306	94.4943	66.7755	122.912	6.42551	3.18684	6.61791
6396.3	56.5078	47.1451	56.4476	12.8472	32.9186	36.8189
6477.7	167.533	13.9261	90.1325	5.21593	3.26957	1.78171
6545.4	165.473	11.7001	4.58094	22.1457	3.23109	102.571
6632.8	141.557	8.12425	112.397	8.58445	7.24229	25.9236
6748.7	221.452	11.1707	61.7367	2.33183	3.71075	7.60252
6828.4	94.336	23.5808	171.369	8.18843	6.60004	2.47516
6940.5	42.3733	42.1722	41.4347	16.4766	42.4546	42.4068
7004.3	221.59	11.7545	57.389	7.25197	2.09949	12.2305
7112.7	220.393	3.16849	58.9893	4.33789	4.22025	22.0755
7220.7	222.624	28.9497	36.2353	7.59854	1.73883	19.4106
7302.3	232.729	12.6516	24.574	5.90799	4.77289	29.5217
7387.4	174.092	4.45658	39.3301	3.92546	11.4318	37.5619
7480.2	195.354	7.65414	23.8956	6.84431	14.0786	41.9699
7550.8	53.2242	32.7638	52.6205	41.7543	21.0616	41.4525
7664.6	269.036	2.36478	2.90488	1.53883	3.20866	35.8121
7773.7	46.457	34.9674	46.0842	33.3706	29.9415	46.8299
7822.2	202.855	10.8011	40.7145	5.01256	2.51031	33.113
7919.9	214.587	6.43258	46.7638	3.52923	4.26378	28.6268
7968.6	51.9547	52.2934	57.7445	19.0633	19.1866	39.5742
8076.4	230.302	9.9016	41.0944	3.74142	3.22341	24.722
8173.4	264.509	0.540713	16.099	2.81525	2.78699	17.9337
8252.7	257.522	6.36884	10.6486	1.88888	10.1556	20.0737
8338.9	204.606	9.8506	11.8252	2.30543	9.73995	67.4719
8468.9	64.3788	26.7425	53.2076	18.9496	32.5283	42.5796
8508.5	170.873	4.9055	58.7118	5.38137	10.4289	50.503
8589.1	145.943	7.00381	37.4063	7.8119	20.3652	65.1385
8616	34.1188	48.8819	36.4777	11.0883	20.8563	50.5992
8672	185.854	7.20347	48.8612	5.02754	9.44269	32.4844
8761.7	112.5	8.56256	56.5702	3.88854	9.69185	30.546

## Sheet: SYP
Cal yr BP	Artemisia	Chenopodiaceae	Cyperaceae	Sanguisorba	Ephedra	Ranunculaceae	Pinus	Abies	Picea	Betula	Carpinus	Quercus	Salix	Tilia	Ulmus	Juglans
-10.3005	24	15	280.688	16.8149	4.21268	0	170.539	5.84141	0	0	0	10.0362	12.4512	0	0	0
232.539	35	13	183.216	4.12374	1.56703	0	98.9645	0	0	1.50774	0	2.80396	0	0	0	0
440.667	26	8	140.324	7.06964	0	0	65.6372	0	0	0	2.30099	2.22429	6.71478	0	0	0
644.811	18	8	165.12	7.08023	0	0	83.6531	0	1.2306	1.31441	0	5.45736	0	0	0	0
854.077	6	4	84.84	1.70316	1.10754	0	27.8194	0.969657	0	0	0	2.40207	1.03662	0	0	0
1101.75	19	9	43.2	6.44003	3.70812	0	88.6921	0	1.50823	0	0	1.45736	0	0	0	0
1349.43	9	2	37.08	6.50739	3.49615	0	34.5854	1.2472	0	0	0	0.888889	1.33333	0	0	0
1541.91	13	15	114.24	3.42511	4.54799	2.20608	51.7391	5.61115	0	0	0	0	2.69019	0	0	0
1673.7	33	30	218.4	6.39828	1.02728	0	113.878	5.51276	4.09131	0	0	0	4.09587	4.09604	0	0
1768.11	37	19	227.88	6.66938	4.95431	6.21162	95.1301	21.4786	0.605588	2.97987	0	7.7907	0	0	0	0
1818.14	5	2	26.22	0.262333	0.146296	0.2916	8.98787	3.1652	0.279482	0	0	2.87028	0	0	0	0
1866.71	40	11	120.96	3.32652	1.92925	0	73.3478	12.7707	0.409731	0	0	5.73299	1.51689	0	0	0
1917.56	34	10	74.4	4.88337	0.551724	1.4264	28.668	4.12903	1.65129	0	0	0.265288	0	0	0	0
1967.04	31	10	192.28	3.20784	0	0	59.5231	4.19305	3.171	0	0	1.80017	0	0	0	0
2016.3	38	20	245.31	2.27707	3.31075	0	95.0986	5.66572	4.28734	0	0	2.45116	0	0	0	0
2060.26	50	27	332.12	21.6521	7.67608	7.17212	151.817	8.49998	1.208	2.35355	0	3.71163	0	6.46	0	0
2104.41	49	16	138.45	11.9006	2.65668	3.69018	77.9326	4.3878	15.444	0	0	7.13152	0	4.6878	0	0
2153.3	10	7	26.18	1.75527	2.90216	1.32832	35.8542	0.229594	6.03665	0	0	0	2.65954	0.2457	0	0
2213.22	27	12	88.54	6.2931	2.72382	3.61532	118.709	8.01598	5.94269	1.35983	0	1.94746	0	0.70414	0	0
2252.22	28	10.12	157.08	15.214	3.20872	4.19408	125.843	3.62989	2.34871	1.6351	0	16.9481	0	0	0	5.21481
2314.33	31	7.77	128.39	16.504	2.76409	0	67.9404	0.699189	2.01426	1.44499	2.02094	21.6869	0	3.2967	0	6.88691
2358.61	46	9.24	129.6	14.6508	3.04516	2.946	69.5096	0.779188	0.826528	6.95054	0	24.8062	0	0.834	0	11.4729
2408.23	59	7.48	120.12	12.6061	9.48129	0	77.9488	5.14814	0.944148	9.17282	0	41.9876	0	0.9526	0	21.4543
2463.55	32	6.8	161.2	13.0687	1.80111	9.188	66.9298	0.842456	0.890104	8.40086	0	39.5349	0	0	0	4.86822
2513.17	34	6.8	131.2	9.87792	7.38954	21.0472	68.2828	3.4564	0.92896	11.1432	0	4.90267	3.69242	0	5.34699	11.5693
2558	48	7.48	115.72	15.2752	3.63942	9.15112	53.3234	0.992631	7.12191	6.45144	4.09303	20.0899	0	0	13.2545	30.3604
2607.21	40	7.449	107.64	10.4284	0.591724	4.65465	60.1862	0.905806	6.34359	14.872	3.65918	17.8372	0	0	1.39321	10.0372
2650.81	34	8.404	98.12	18.8148	3.76471	3.30616	85.3866	3.88995	4.15347	8.03923	4.15967	26.021	4.15967	4.15976	8.95023	12.821
2695.32	30	8.404	146.08	12.6643	0	14.0681	73.7805	1.08054	11.7708	2.23312	0	14.3218	0	0	8.99531	8.45134
2744.44	28	10.92	129.6	9.92159	0.791992	3.4176	82.9713	4.88658	12.1083	7.43226	0	18.3807	0	0	2.89031	2.38071
2794.79	36	17.424	144.32	17.9632	0.933838	12.1339	69.4845	5.40454	11.8368	12.6285	0	21.7196	4.26161	0	3.23005	9.98622
2844.46	12	4.932	51.84	9.15305	1.65544	0.97038	28.4393	0.483997	0.5134	7.00026	0	6.49922	0	1.75788	1.34213	1.09922
2889.1	16	5.06	73.2	4.57436	0.488542	5.5274	24.3403	1.84142	2.65354	5.13892	0	12.5685	0	0	3.51174	4.56848
2945.11	24	6.524	97.72	9.21059	1.69433	11.4789	17.4395	8.91921	2.76922	2.56637	0	7.3509	0	0	2.1487	2.68424
2989.16	29	4.716	96.12	7.52933	0	1.16784	24.8269	21.9491	4.83041	6.95535	2.35766	16.6791	0	0	1.6041	3.47907
3038.83	12	5.775	76.44	9.01628	2.06216	2.08677	14.4985	8.75313	2.83443	1.28981	2.11628	12.5457	0	0	1.65992	0
3088.22	12	6.72	30.8	3.39289	4.7475	4.6594	17.7903	11.5754	1.33428	1.92258	0	9.29543	0	1.3402	0.9347	0
3145.8	5	4.524	25.08	1.31831	0.387097	4.39812	11.0801	3.08429	1.63875	0	0	3.1876	0	0	0.576185	0
3199.24	9	2.568	26.04	2.76109	0.404183	0.4014	13.4684	4.64067	0.405846	0	0.823309	0.395866	2.06469	0	0.588476	0
3259.13	9	4.7	11.54	2.20612	0	0	29.7352	8.39625	9.65959	3.35226	0	0	0	0	4.33717	0
3313.24	9	4.14	21.9	1.95782	2.62225	0	19.3365	1.46847	4.66908	1.03484	0	0	2.60358	0	1.76825	0
3379.18	19	1.7256	24.96	3.13846	1.75555	0	49.2064	11.6579	14.9379	0.892903	0	0	0.87677	2.532	0.459924	0
3488.23	7	-0.20526	14.102	4.64639	0	0	25.5	1.48986	6.89655	0	0	0	4.62818	2.35224	0	0
3542.39	8	-0.183	8.2	0.628288	0	1.143	18.5675	13.6291	4.90618	0	0	0	0	0.0838	0	0
3603.17	7	2.4232	14.482	2.3828	2.0453	2.07038	19.8602	2.63842	7.29295	0	0	0	1.02628	0.12974	0.608109	0
3662.28	5	1.3076	7.224	1.28652	1.12872	0	22.2747	2.78601	5.38761	0	0	0	2.49488	0.08106	0	0
3790.6	6	1.5024	5.904	3.71613	1.33838	1.28672	19.6647	4.23892	1.21718	2.89376	1.2232	0	2.32665	0.11968	0	0
3850.71	5	3.906	4.752	1.3063	1.54091	0	26.3018	10.5917	10.0749	0.889549	0	0	1.39054	1.3905	1.70627	0
3911.21	8	9.452	26.826	4.51477	7.64868	0	49.7073	2.48083	12.0229	0	0	0	0	0	0	0
3972.1	6	4.224	23.472	5.59246	2.95902	0	29.5523	11.8357	1.88512	0	0	0	1.89254	1.89264	0	0
4031.21	5	2.76	15.432	1.27801	1.33802	0	49.405	4.88391	6.86759	0.48929	0	1.05013	0	2.73936	0	0
4093.31	6	3.04	27.968	1.7109	6.25477	0	35.2209	8.60304	5.87187	0.70744	0	1.42222	1.47126	0.36768	0	0
4147.31	8	2.176	34.96	5.34789	3.73749	0	38.7643	4.32882	7.37163	0.939356	0	1.8019	4.62622	0.4884	4.01707	0
4207.03	6	2.4066	4.0572	5.39059	4.99291	0	36.1034	7.62136	6.39763	0.630814	2.06576	0.3169	2.93472	0.327852	0	0
4266.47	2	0.3726	3.0996	3.6084	0.671306	0	22.2645	1.88174	0.51785	0.647071	0	0.504186	1.2664	1.26641	1.1095	0.864186
4327.69	3	1.918	5.782	4.68079	0.892636	0.8456	22.8558	4.25507	0.681178	0	0	0	4.06665	0.20454	1.45437	1.59776
4394.47	2	1.3454	10.486	1.60404	0.915061	0.53802	26.5701	1.10543	1.1763	1.34882	0	1.14195	0.698565	0.21574	1.47051	1.60861
4450.35	3	3.288	6.912	3.23494	0.775262	3.06144	15.417	1.13881	2.03347	2.34942	2.04437	0	2.04437	2.04432	2.54853	0
4504.07	2	2.055	2.745	1.42506	3.08943	1.2504	10.1417	0.720499	0.24703	0.989032	0	0	0	0.25395	1.6082	0
4561.79	3	2.3256	14.472	1.80645	1.67973	1.47432	55.9138	18.9792	2.07162	0.819612	0	1.21137	0	2.0808	5.00077	2.81137
4691.3	4	4.776	28.08	9.49439	1.73099	3.61632	55.149	6.61811	5.40951	0	0	0	0	2.11056	3.44379	5.24031
4750.65	5	5.572	35.56	11.64	2.04939	4.22268	64.3549	2.31342	7.28897	0	0	0	0	2.47492	1.23568	7.99242
4828.48	3	4.6848	42.048	13.2455	0	7.25136	135.743	34.9736	7.56802	1.87871	0	0	0	4.28112	13.3736	23.3385
4910.64	15	27.984	135.3	10.3078	5.04214	9.98778	105.967	9.81003	5.90675	2.67406	0	10.1359	5.93371	12.7611	5.25634	40.9359
4999.67	10	10.6752	136.704	10.475	16.556	11.6406	123.365	6.51162	6.92757	13.4441	0	4.17406	0	14.9107	6.2148	14.4141
5177.32	8	5.236	49.72	10.421	2.04779	1.8018	78.0183	16.5671	4.03885	1.97196	0	6.8596	0	5.57876	13.923	17.1263
5258.09	4	8.832	86.664	8.66946	4.55109	3.50023	61.42	11.9177	3.20247	4.39938	0	3.12372	5.13489	5.1347	4.64358	12.3237
5346.71	15	11.9796	69.732	15.3343	7.06449	10.4169	76.2127	5.2319	3.51037	2.85567	11.7575	3.41891	0	5.59227	20.9757	13.3522
5425.03	6	5.856	45.9208	5.73329	0.814238	8.54	78.5675	9.03486	2.90874	4.04043	4.61345	2.83301	4.61345	0	5.83809	14.2197
5505.39	5	5.76	170.88	3.73042	0.869232	8.41248	53.5111	10.4711	2.89496	15.232	4.57632	7.62377	0	0	16.9977	12.4238
5603.58	15	2.77536	155.288	3.6784	4.19392	8.2836	66.7022	5.76812	4.51181	10.3475	2.91031	18.5466	0	4.53781	4.18213	10.68
5683.7	14	5.28	149.6	7.83921	0.929922	1.86648	44.7559	3.98335	1.20252	3.83983	4.26161	17.3196	4.26161	4.2614	9.81033	14.3862
5772.89	18	8.16	265.2	12.1309	8.58055	14.9913	64.7246	6.2127	6.60215	19.6162	1.95099	26.8193	6.64065	11.3302	8.43978	8.69181
5871.4	8	7.744	263.04	11.4332	8.17833	16.9715	71.5501	18.2823	1.85651	18.5834	0	18.8968	0	6.3072	5.89194	12.4968
5961.41	3	1.18548	53.724	2.35111	0.386545	2.61294	10.6864	2.80784	0.441078	1.36033	0.960029	3.88803	0	1.47038	1.37956	2.90136
6038.26	20	1.13072	182.336	9.41912	0	7.83571	97.5815	13.1903	9.97688	19.3463	12.0531	9.678	5.92897	1.84645	15.4531	11.6513
6149.53	14	2.9452	145.78	7.35103	7.27324	1.59174	48.6594	52.3436	2.32955	7.0308	0	4.75487	0	2.36726	7.06838	7.22153
6315.89	6	3.3936	155.12	11.188	0	2.47632	77.631	28.8566	0	9.22736	3.81217	9.2851	3.81217	5.74336	12.9448	5.55177
6406.4	18	3.672	105.84	10.0806	3.70491	2.4012	28.5122	5.80046	3.69553	11.9814	7.44186	1.1938	0	3.71772	14.3585	3.5938
6485.7	6	0.8526	36.12	4.21042	4.39715	1.87908	30.5161	4.0855	1.44828	2.85058	11.6124	11.2253	2.92275	2.92278	8.4	4.22532
